# Supplementary material
Source: PubMed Central journal article supplement (PMC4146649)
Supplement: NIHMS612562-supplement-3.pdf [file NIHMS612562-supplement-3.pdf]

**Supplementary Table 1.** Coordinates and mean percent methylation levels for all *SLC6A4* CpG sites assayed in the Discovery cohort. Number of participants with 0% methylation is indicated for each site. The sites assayed in all three samples are in bold font. All promoter sites are in the proximal promoter.

| Assay ID          | From ATG | From TSS | GRCh37/hg19 chr17 | Region   | Mean  | SD           | Number (%) participants with 0% methylation |
|-------------------|----------|----------|-------------------|----------|-------|--------------|---------------------------------------------|
| <b>ADS1818FS2</b> | -12380   | +497     | 28562219          | intron 1 | 19.48 | 5.43         | 0 (0.00%)                                   |
|                   | -12382   | +495     | 28562221          | intron 1 | 28.28 | 7.73         | 0 (0.00%)                                   |
| <b>ADS1818FS1</b> | -12426   | +451     | 28562265          | intron 1 | 18.62 | 5.2          | 1 (1.25%)                                   |
|                   | -12451   | +426     | 28562290          | intron 1 | 27.69 | 6.66         | 1 (1.25%)                                   |
|                   | -12496   | +381     | 28562335          | intron 1 | 8.19  | 2.89         | 1 (1.25%)                                   |
| <b>ADS579FS1</b>  | -12758   | +119     | 28562597          | exon 1   | 0.038 | 0.34         | 79 (98.75%)                                 |
|                   | -12766   | +111     | 28562605          | exon 1   | 2.19  | 1.38         | 21 (26.25%)                                 |
|                   | -12771   | +106     | 28562610          | exon 1   | 7.82  | 2.02         | 1 (1.25%)                                   |
|                   | -12784   | +93      | 28562623          | exon 1   | 8.41  | 2.01         | 0 (0.00%)                                   |
| <b>ADS579FS2</b>  | -12804   | +73      | 28562643          | exon 1   | 6.95  | 2.51         | 5 (6.25%)                                   |
|                   | -12806   | +71      | 28562645          | exon 1   | 6.06  | 2.54         | 8 (10.00%)                                  |
|                   | -12821   | +56      | 28562660          | exon 1   | 1.79  | 2.39         | 50 (62.50%)                                 |
|                   | -12834   | +43      | 28562673          | exon 1   | 10.12 | 1.93         | 1 (1.25%)                                   |
|                   | -12845   | +32      | 28562684          | exon 1   | 7.66  | 1.72         | 1 (1.25%)                                   |
|                   | -12847   | +30      | 28562686          | exon 1   | 4.17  | 2.36         | 17 (21.25%)                                 |
|                   | -12853   | +24      | 28562692          | exon 1   | 1.32  | 2.27         | 59 (73.75%)                                 |
|                   | -12862   | +15      | 28562701          | exon 1   | 1.76  | 2.45         | 52 (65.00%)                                 |
|                   | -12865   | +12      | 28562704          | exon 1   | 3.09  | 2.94         | 37 (46.25%)                                 |
|                   | -12868   | +9       | 28562707          | exon 1   | 0.45  | 1.3          | 71 (88.75%)                                 |
|                   | -12879   | -3       | 28562718          | promoter | 1.58  | 2.27         | 53 (66.25%)                                 |
|                   | -12887   | -11      | 28562726          | promoter | 0     | 0            | 80 (100.00%)                                |
|                   | -12890   | -14      | 28562729          | promoter | 0.21  | 1.1          | 77 (96.25%)                                 |
|                   | -12893   | -17      | 28562732          | promoter | 0     | 0            | 80 (100.00%)                                |
|                   | -12895   | -19      | 28562734          | promoter | 0     | 0            | 80 (100.00%)                                |
|                   | -12899   | -23      | 28562738          | promoter | 0     | 0            | 80 (100.00%)                                |
| -12911            | -35      | 28562750 | promoter          | 0.07     | 0.64  | 79 (98.75%)  |                                             |
| -12913            | -37      | 28562752 | promoter          | 0        | 0     | 80 (100.00%) |                                             |
| <b>ADS580FS1</b>  | -12945   | -69      | 28562784          | promoter | 1.79  | 0.54         | 1 (1.25%)                                   |
|                   | -12948   | -72      | 28562787          | promoter | 1.44  | 0.81         | 3 (3.75%)                                   |
|                   | -12975   | -99      | 28562814          | promoter | 1.06  | 0.54         | 11 (13.75%)                                 |

|           |        |      |          |          |      |      |             |
|-----------|--------|------|----------|----------|------|------|-------------|
|           | -12988 | -112 | 28562827 | promoter | 1.55 | 0.63 | 7 (8.75%)   |
| ADS580FS2 | -13009 | -133 | 28562848 | promoter | 2.87 | 0.45 | 1 (1.25%)   |
|           | -13011 | -135 | 28562850 | promoter | 1.1  | 0.33 | 1 (1.25%)   |
|           | -13015 | -139 | 28562854 | promoter | 1.21 | 0.36 | 2 (2.50%)   |
|           | -13017 | -141 | 28562856 | promoter | 0.92 | 0.34 | 5 (6.25%)   |
|           | -13023 | -147 | 28562862 | promoter | 2.24 | 0.45 | 1 (1.25%)   |
|           | -13025 | -149 | 28562864 | promoter | 1.02 | 0.34 | 3 (3.75%)   |
|           | -13031 | -155 | 28562870 | promoter | 1.89 | 0.38 | 1 (1.25%)   |
|           | -13046 | -170 | 28562885 | promoter | 3.57 | 0.82 | 1 (1.25%)   |
|           | -13050 | -174 | 28562889 | promoter | 1.59 | 0.47 | 2 (2.50%)   |
|           | -13064 | -188 | 28562903 | promoter | 1.74 | 0.38 | 1 (1.25%)   |
|           | -13066 | -190 | 28562905 | promoter | 0.76 | 0.53 | 22 (27.50%) |
|           | -13071 | -195 | 28562910 | promoter | 0.74 | 0.62 | 30 (37.50%) |
|           | -13076 | -200 | 28562915 | promoter | 0.88 | 0.67 | 26 (32.50%) |
|           | -13083 | -207 | 28562922 | promoter | 1.25 | 0.48 | 7 (8.75%)   |
|           | -13085 | -209 | 28562924 | promoter | 0.66 | 0.6  | 34 (42.50%) |
|           | -13089 | -213 | 28562928 | promoter | 0.97 | 0.65 | 22 (27.50%) |

**Supplementary Table 2.** Site-specific principal component loadings in the Discovery cohort presented for the five components with eigenvalues > 1.

| <b>DNS</b>      | <b>Component (% variance accounted for)</b> |                       |                      |                      |                      |
|-----------------|---------------------------------------------|-----------------------|----------------------|----------------------|----------------------|
| <b>CpG site</b> | <b>1<br/>(24.06%)</b>                       | <b>2<br/>(13.12%)</b> | <b>3<br/>(9.41%)</b> | <b>4<br/>(7.22%)</b> | <b>5<br/>(5.91%)</b> |
| 1               | 0.218                                       | 0.381                 | 0.669                | -0.006               | 0.156                |
| 2               | 0.158                                       | 0.515                 | 0.534                | 0.009                | 0.423                |
| 3               | 0.442                                       | -0.01                 | 0.142                | -0.546               | 0.005                |
| 4               | 0.584                                       | -0.035                | 0.188                | -0.459               | -0.009               |
| 5               | 0.574                                       | 0.11                  | -0.245               | 0.237                | -0.006               |
| 6               | 0.232                                       | 0.627                 | -0.236               | 0.338                | 0.142                |
| 7               | 0.429                                       | 0.177                 | -0.374               | -0.381               | -0.174               |
| 8               | 0.286                                       | 0.55                  | -0.326               | 0.126                | 0.313                |
| 9               | 0.405                                       | 0.278                 | 0.132                | 0.432                | -0.53                |
| 10              | 0.321                                       | 0.348                 | 0.526                | -0.019               | -0.46                |
| 11              | 0.489                                       | 0.492                 | -0.037               | -0.272               | -0.185               |
| 12              | 0.543                                       | 0.013                 | -0.307               | 0.246                | -0.298               |
| 13              | 0.73                                        | -0.019                | -0.263               | -0.167               | 0.145                |
| 14              | 0.234                                       | 0.517                 | -0.302               | -0.082               | 0.22                 |
| 15              | 0.696                                       | -0.17                 | -0.123               | -0.114               | -0.079               |
| 16              | 0.514                                       | -0.483                | 0.074                | 0.162                | 0.179                |
| 17              | 0.574                                       | -0.46                 | 0.131                | -0.007               | -0.064               |
| 18              | 0.592                                       | -0.157                | 0.379                | 0.323                | 0.094                |
| 19              | 0.608                                       | -0.299                | 0.003                | 0.324                | 0.178                |
| 20              | 0.605                                       | -0.421                | 0.028                | 0.009                | 0.248                |

**Supplementary Table 3.** Results from regression analyses in the Discovery cohort using amygdala reactivity as a dependent variable and the first principal component capturing 24.06% of all *SLC6A4* proximal promoter methylation variance as an independent variable. Covariates include age, gender, LESS Highest Impact, CTQ Total, 5-HTTLPR/rs25531 genotype, and current Axis I diagnosis (dummy coded: 0 = no, 1 = yes).

| <i>SLC6A4</i> promoter methylation (PC 1) | $\Delta R^2$ | b     | p            |
|-------------------------------------------|--------------|-------|--------------|
| <b>No Covariates</b>                      |              |       |              |
| Left amygdala                             | 0.070        | 0.264 | <b>0.018</b> |
| Right amygdala                            | 0.042        | 0.204 | 0.070        |
| <b>With Covariates</b>                    |              |       |              |
| Left amygdala                             | 0.079        | 0.284 | <b>0.012</b> |
| Right amygdala                            | 0.043        | 0.210 | 0.066        |

**Supplementary Table 4.** Location and mean percent methylation of all assayed *COMT* promoter CpG sites in the Discovery cohort.

|             |                            |                            |                   | Percent methylation |       |
|-------------|----------------------------|----------------------------|-------------------|---------------------|-------|
| Assay ID    | Position (relative to ATG) | Position (relative to TSS) | GRCh37/hg19 chr22 | Mean                | SD    |
| ADS2791 FS1 | -11466                     | -442                       | 19938584          | 88.65               | 1.72  |
|             | -11446                     | -422                       | 19938604          | 81.16               | 3.96  |
|             | -11442                     | -418                       | 19938608          | 92.32               | 1.29  |
|             | -11440                     | -416                       | 19938610          | 89.72               | 6.39  |
|             | -11434                     | -410                       | 19938616          | 75.67               | 28.18 |
|             | -11430                     | -406                       | 19938620          | 93.34               | 3.16  |
| ADS2791 FS2 | -11402                     | -378                       | 19938648          | 95.01               | 2.38  |
|             | -11397                     | -373                       | 19938653          | 91.41               | 1.46  |
|             | -11393                     | -369                       | 19938657          | 91.76               | 6.21  |
|             | -11386                     | -362                       | 19938664          | 87.36               | 1.62  |

**SD = Standard Deviation**

**Supplementary Table 5.** Site-specific principal component loadings in the Replication cohort presented for the five components with eigenvalues > 1.

| TAOS<br>CpG site | Component (% variance accounted for) |               |               |              |              |
|------------------|--------------------------------------|---------------|---------------|--------------|--------------|
|                  | 1<br>(30.41%)                        | 2<br>(14.50%) | 3<br>(10.34%) | 4<br>(6.30%) | 5<br>(5.21%) |
| 1                | -0.03                                | -0.101        | 0.793         | -0.032       | 0.197        |
| 2                | 0.11                                 | -0.319        | 0.634         | -0.241       | 0.244        |
| 3                | 0.085                                | -0.385        | 0.607         | -0.046       | 0.12         |
| 4                | 0.072                                | 0.057         | 0.574         | 0.455        | -0.471       |
| 5                | 0.717                                | 0.007         | -0.159        | 0.282        | -0.009       |
| 6                | 0.283                                | 0.841         | -0.04         | -0.117       | 0.106        |
| 7                | 0.753                                | -0.045        | -0.214        | 0.191        | 0.254        |
| 8                | 0.443                                | 0.252         | 0.012         | 0.452        | 0.455        |
| 9                | 0.761                                | 0.275         | -0.069        | -0.312       | -0.096       |
| 10               | 0.653                                | -0.339        | -0.126        | 0.031        | -0.137       |
| 11               | 0.75                                 | -0.241        | -0.092        | 0.07         | -0.155       |
| 12               | 0.609                                | -0.119        | 0.039         | -0.165       | -0.518       |
| 13               | 0.717                                | -0.234        | 0.138         | 0.114        | -0.104       |
| 14               | 0.645                                | -0.31         | 0.09          | -0.24        | 0.049        |
| 15               | 0.762                                | -0.308        | -0.083        | -0.112       | 0.075        |
| 16               | 0.314                                | 0.505         | 0.26          | 0.312        | -0.083       |
| 17               | 0.212                                | 0.69          | 0.305         | 0.104        | -0.144       |
| 18               | 0.646                                | 0.176         | 0.072         | -0.414       | 0.055        |
| 19               | 0.781                                | -0.032        | -0.021        | 0.198        | 0.234        |
| 20               | 0.278                                | 0.768         | 0.188         | -0.355       | 0.016        |

**Supplementary Table 6.** Results from regression analyses in the Replication cohort using amygdala reactivity as a dependent variable and the first principal component capturing 30.41% of all *SLC6A4* proximal promoter methylation variance as an independent variable in the Replication cohort. Covariates include age, gender, psychopathology risk, CTQ Total, and 5-HTTLPR/rs25531 genotype.

| <i>SLC6A4</i> promoter methylation (PC 1) | $\Delta R^2$ | b     | p            |
|-------------------------------------------|--------------|-------|--------------|
| <b>No Covariates</b>                      |              |       |              |
| Left amygdala                             | 0.101        | 0.318 | <b>0.002</b> |
| Right amygdala                            | 0.009        | 0.096 | 0.354        |
| <b>With Covariates</b>                    |              |       |              |
| Left amygdala                             | 0.076        | 0.287 | <b>0.009</b> |
| Right amygdala                            | 0.003        | 0.055 | 0.623        |
